# Supplementary material for: ADRV 12L: A Ranaviral Putative Rad2 Family Protein Involved in DNA Recombination and Repair
Source: MDPI journal article supplement (doi:10.3390/v14050908), 2022-04-27
Supplement: s1 [file s1]

Table S1 Primers used in the study.

| Primers                  | Sequences (5'-3')                                  | Constructs or applications                                |
|--------------------------|----------------------------------------------------|-----------------------------------------------------------|
| <i>12L</i> -F            | GTGCGGCACAGACTTTAACC                               | RT-PCR                                                    |
| <i>12L</i> -R            | ATGTCCCCGCCAGAGAGTAT                               |                                                           |
| $\beta$ -actin-F         | CCACTGCTGCCTCCTCTT                                 | Protein expression                                        |
| $\beta$ -actin-R         | GCAATGCCTGGGTACATG                                 |                                                           |
| 32a-12L-F                | ACAAGAATTCTCTCCACCCGAAAAGTCTAG                     |                                                           |
| 32a-12L-R                | TACTAAGCTTTTCATCCGAGGGCCTCCTTGG                    |                                                           |
| 12L <sub>L</sub> -F      | GCCAAGACCAAGGACACACTGTCC                           | pMD18T-12L <sub>L</sub> -GFP-                             |
| 12L <sub>L</sub> -EGFP-R | CTTGCGCTTTCTCAGAGGTTTTTTGGTTGTTTAACTCGT<br>AGG     | P50-12L <sub>R</sub> used in mutant<br>virus construction |
| 12L <sub>L</sub> -EGFP-F | CCTACGAGTTAAACAACCAAAAAACCTCTGAGAAAGC<br>GCAAG     |                                                           |
| EGFP-12L <sub>R</sub> -R | CTCGTACTACACACTCCCACAAGTAGAATGCAG                  |                                                           |
| EGFP-12L <sub>R</sub> -F | CTGCATTCTAGTTGTGGGAGTGTGTAGTACGAG                  |                                                           |
| 12L <sub>R</sub> -R      | CAGAAAGTTTGCAGAGCGTCAGCTC                          |                                                           |
| R12L-F                   | ATGGGCATAAAAGGACTGAAACCCCTTC                       | Detection of <i>12L</i>                                   |
| R12L-R                   | TCACTTGCCTTGCCTTCTCAAAGG                           |                                                           |
| P50-EGFP-F               | AACCTCTGAGAAAGCGCAAGCCTC                           | Detection of <i>P50-EGFP</i>                              |
| P50-EGFP-R               | TTACTTGTACAGCTCGTCCATGCC                           |                                                           |
| P18-luci-40-F            | ACTAGGTCCGCCGACGAGCCCATG                           | P <sub>18</sub> -lucT <sub>(1-2103)</sub>                 |
| P18-luci-F               | ACACTTTACATTACAAATGCGCATGGAAGACGCCAAAA<br>ACATAAAG |                                                           |
| P18-luci-R               | CTTTATGTTTTTGGCGTCTTCCATGCGCATTGTGAATGTA<br>AAGTGT |                                                           |
| luci-40-F                | GGAAAGATCGCCGTGTAAAGCGGCCGCGACTCTAGATC             |                                                           |
| luci-40-R                | GATCTAGAGTCGCGGCCGCTTTACACGGCGATCTTTCC             |                                                           |
| P18-luci-40-R            | TAAGATACATTGATGAGTTTGGAC                           |                                                           |
| P18-Rluc-F               | ACATTACCATGAGCATGACTTCGAAAGTTTATGATCC              | P <sub>18</sub> -Rluc                                     |
| P18-Rluc-R               | GGATCATAAACTTTCGAAGTCATGCTCATGGTGAATGT             |                                                           |
| Rluc-R                   | TACCACATTTGTAGAGGTTTTACTTG                         |                                                           |
| 18luci40-<br>1334R       | CAGATCCACAACCTTCGCTTC                              | P <sub>18</sub> -luc <sub>(1-1334)</sub>                  |
| 18luci40-734F            | AATGAATACGATTTTGTGCCAG                             | lucT <sub>(734-2103)</sub>                                |
| 18luci40-934F            | CCATCACGGTTTTTGAATGTTTAC                           | lucT <sub>(934-2103)</sub>                                |
| 18luci40-1134F           | ACGAAATTGCTTCTGGTGGC                               | lucT <sub>(1134-2103)</sub>                               |
| DSB-F1                   | ATGGAAGACGCCAAAAACATAAAGAAAG                       | DSB1                                                      |
| DSB-R1                   | GCTCATGGTGAATGTAAAGTGTTTAC                         |                                                           |
| DSB-F2                   | GCCGCGACTCTAGATCATAATC                             | DSB2                                                      |
| DSB-R2                   | GTAAACATTCCAAAACCGTGATGG                           |                                                           |
