# Supplementary material for: ADRV 12L: A Ranaviral Putative Rad2 Family Protein Involved in DNA Recombination and Repair
Source: MDPI journal article supplement (doi:10.3390/v14050908), 2022-04-27
Supplement: s1 [file s1]

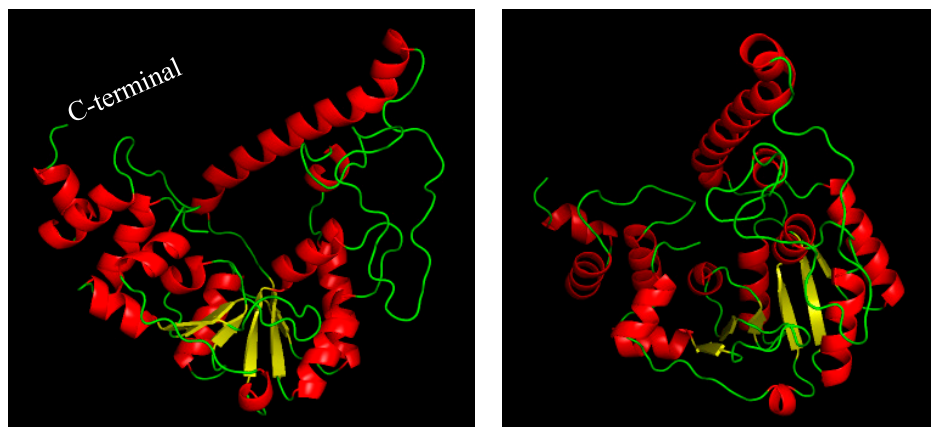

Figure S1 Predicted structure of ADRV 12L. The structure was predicted by RoseTTAFold in the Robetta (<http://robetta.bakerlab.org/>) and visualized by PyMOL. The two figures were obtained from different directions. Red, Helix; yellow, sheet; green, loop.
