# Supplementary material for: ADRV 12L: A Ranaviral Putative Rad2 Family Protein Involved in DNA Recombination and Repair
Source: MDPI journal article supplement (doi:10.3390/v14050908), 2022-04-27
Supplement: s1 [file s1]

Table 2 GenBank accession numbers of the Rad2 homologues used in the sequence alignment.

| Virus                                                 | Protein             | Accession number |
|-------------------------------------------------------|---------------------|------------------|
| <i>Andrias davidianus</i> ranavirus (ADRV)            | 12L                 | AGV20543.1       |
| Frog virus 3 (FV3)                                    | 95R                 | YP_031674.1      |
| <i>Rana grylio</i> virus (RGV)                        | 102R                | AFG73144.1       |
| Common midwife toad virus (CMTV)                      | 12L                 | ASH98834.1       |
| Epizootic haematopoietic necrosis virus (EHNV)        | 10L                 | YP_009182009.1   |
| <i>Ambystoma tigrinum</i> virus (ATV)                 | 9L                  | ALN37112.1       |
| Singapore grouper iridovirus (SGIV)                   | 97L                 | YP_164192.1      |
| Lymphocystis disease virus isolated in China (LCDV-C) | 169R                | YP_073674.1      |
| Infectious spleen and kidney necrosis virus (ISKNV)   | 27L                 | NP_612249.1      |
| <i>Xenopus tropicalis</i>                             | flap endonuclease 1 | NP_001017005.1   |
| <i>Homo sapiens</i>                                   | flap endonuclease 1 | NP_004102.1      |
